# Supplementary material for: Channel nuclear pore complex subunits are required for transposon silencing in Drosophila
Source: eLife. 2021 Apr 15;10:e66321. doi: 10.7554/eLife.66321 (PMC8133776; doi:10.7554/eLife.66321)
Supplement: Supplementary file 1. [file elife-66321-supp1.xlsx]

## Sheet: Sheet1
List of fly stocks used in this study
STOCK NR	Genotype	Description	Source
na	w; Nup54[9B4]/CyO,GFP; ;	Nup54 locus ∆	M. Soller
na	w; Nup54[MB03363]/CyO, actGFP w+; ;	Nup54 MB	M. Soller
BL13912	w1118 P{GT1}flam[BG02658]	flam Mutant BG02658	Bloomington Drosophila Stock Center
BL16453	y1 P{SUPor-P}flam[KG00476/FM4]	flam Mutant KG00476 / FM4	Bloomington Drosophila Stock Center
JB313276	w; EGFP-fs(1)Yb [attP40]/CyO; ;	GFP-Yb	VDRC
List of siRNAs used in this study
siRNA-Lam-1-s	CGAAGAUCAUAAUUUAGAACC	siRNA-Lam-1-as	UUCUAAAUUAUGAUCUUCGUG
siRNA-nup154-2-s	CGACACUAAUCGUCUUCAACA	siRNA-nup154-2-as	UUGAAGACGAUUAGUGUCGGG
siRNA-nup214-1-s	GGAUGUGGAGUUCGAGUUAGA	siRNA-nup214-1-as	UAACUCGAACUCCACAUCCUU
siRNA-elys-1-s	GCGCGAGUUUCAAGUGCUAUC	siRNA-elys-1-as	UAGCACUUGAAACUCGCGCCG
siRNA-nup43-1-s	AGUUGAUAAUAUUGUUUAAAU	siRNA-nup43-1-as	UUAAACAAUAUUAUCAACUAG
siRNA-nup107-1-s	GGCAGUUGUACAAAGUCUAUA	siRNA-nup107-1-as	UAGACUUUGUACAACUGCCGA
siRNA-nup98-96-1-s	GGAGCAACGCAACAGUCAACU	siRNA-nup98-96-1-as	UUGACUGUUGCGUUGCUCCGG
siRNA-nup54-1-s	CAACAUGCUUGUUCACAUAGA	siRNA-nup54-1-as	UAUGUGAACAAGCAUGUUGGG
siRNA-nup58-1-s	CGAGAUCACGAACUUGAAAUG	siRNA-nup58-1-as	UUUCAAGUUCGUGAUCUCGUG
siRNA-Nup93-1-s	CGACGUCCAGUUUCAGAUAGU	siRNA-Nup93-1-as	UAUCUGAAACUGGACGUCGGG
siRNA-nup62-1-s	GGAAGAUCGUCGAGCUCAACG	siRNA-nup62-1-as	UUGAGCUCGACGAUCUUCCCG
siRNA-yb_s	GGAGCAAGAGAUAAAUUUAAG	siRNA-yb_as	UAAAUUUAUCUCUUGCUCCUU
siRNA-yb-2-s (targets 3'UTR)	GCAUUCUCUUGCGAAAGAAAC	siRNA-yb-2-as	UUCUUUCGCAAGAGAAUGCUG
siRNA-zuc_s	CGAACUUGAUGCACAACAAAU	siRNA-zuc_as	UUGUUGUGCAUCAAGUUCGUG
siRNA-EGFP-3-s	AGCUGGAGUACAACUACAACA	siRNA-EGFP-3-as	UUGUAGUUGUACUCCAGCUUG
siRNA-nxf1-2-s	GCAGUUUAUCAGCGAAGUACG	siRNA-nxf1-2-as	UACUUCGCUGAUAAACUGCUG
siRNA-nxt1-2-s	CCGUCAAGUUCGCAGAUCAGC	siRNA-nxt1-2-as	UGAUCUGCGAACUUGACGGAG
siRNA-nxf2-2-s	GGUACUUCACGGAAAUAAACU	siRNA-nxf2-2-as	UUUAUUUCCGUGAAGUACCAG
siRNA-nxf3-1-s	GGUGUUCACUUCGAGUCUACG	siRNA-nxf3-1-as	UAGACUCGAAGUGAACACCUG
List of flam RNA FISH probes
RF_EK13	Flam_7_5'	GCCCTTACTCCCAATTCCaaaaaCTAGCTTGCCCTCTGGACCAAACTGGATCTATTTCCTGGACACAGGACCAAA
RF_EK14	Flam_8_5'	GCCCTTACTCCCAATTCCaaaaaGCGCGTTCTCACAACTCGTATTTAGTTTTCGCAATCTACCCGTTTGCCTAAC
RF_EK15	Flam_9_5'	GCCCTTACTCCCAATTCCaaaaaGAGGAAAATGGGATTTTCCTGTAATGGTTTGGTCATACAGCTTGTAGGGAAA
RF_EK16	Flam_10_5'	GCCCTTACTCCCAATTCCaaaaaAGGGAAGAGTTCTATCCGAGAGAACTCGGGCCAATTTATTACCAATTTTTAC
RF_EK18	Flam_18_5'	GCCCTTACTCCCAATTCCaaaaaTCACAATGATATCTAGGACCCTACCAACTCTGGCAAGCTTCCAGCATGACTA
RF_EK20	Flam_20_5'	GCCCTTACTCCCAATTCCaaaaaTAAAGGGTGCCGCCTTTCAGATTTTGATCGATCACAAACCCCTCGTTTGGCT
RF_EK21	Flam_21_5'	GCCCTTACTCCCAATTCCaaaaaTTGAGTTGCCCTAATTTCAAACCAACCATTTCGAGTCACTACTGACGCTAGC
List of oligos used for qPCR
	FW	REV
act5c	GCATCCACGAGACCACCTACAAC	CGGTGATCTCCTTCTGCATACGG
elys	TAACTCCAACTGGCAAACGGTA	GAATGTGGCGTTAGGGTTAAGC
gypsy	AGAAAGTCGCCGTCTACCCTGTA	GTGTGACATTGAGCAGCGTTTCC
lamin	CAGCTGGACAACGATCGCG	TGGTGGCTGGGGTGATGTTC
mdg1	TATACGAACACTCCACCACCCCA	GGCTTTTCGGATTGGGAGTTGGA
nup107	CGAAGTGATGTTCAAGTCGGGA	ATAGCCCCATGGATCCAGTTTC
nup154	GGAAGTTAAAGCCTGCCAACTG	AATGCCACTCATTACCCTCGTT
nup214	ACCAGCAAGCCTACGAATGTAA	CTCCTCCAAAAATGTTGGCTGG
nup43	TCCATCAAAAGGATCCCAGCAA	CGAACATTACTCAGCACTCCCT
nup54	AACGCTTCACAGTTTATTCGGC	TTTGAGAGTTCGGTGGCAAGTA
nup58	CAGCAGAAGACCATCTCCTCTG	ATCAGGCGGATCTGCTGATTG
nup62	AGTGAAAACCGATCAGCAAGTG	GTGTGTCCAGATTCTCCACCAT
nup93-1	ATGAGCAGATGTACGCTGAACA	GCAATACATTCCACATCTCGGC
nup98	TCCTGCTTTCGGACAGACTAAC	TGGAGCTCCAAATCCAAAACCT
nxf1	ACGACGAGACCAACAATCCC	CGTTGCGGATACAAAAGCCA
nxt1	ATGGACAGCGATTTGAAAGCC	TTTGTTGGCGTCGGTTGTCC
rp49	GTCGGATCGATATGCTAAGCTG	CAGATACTGTCCCTTGAAGCG
List of flam DNA FISH probes
A1	oligopaint_01	TTGATACCCAATCTGCCACTGAAATCCTCTTCTGTGGtttCAACTTAAC
A2	oligopaint_02	CCGTGTATTTTGCGACACACTGTGGGTTTGGTTTTtttCAACTTAAC
A3	oligopaint_03	TGCAGTTCAAAATTATTCGTTGTTGAAAACGGCTCCGGtttCAACTTAAC
A4	oligopaint_04	GGCCGTGAAAGTGTGCAACTCTCTGTTCGGCtttCAACTTAAC
A5	oligopaint_05	GGGCGATTTTCTTTGATCTGCCGTTGGCGTGtttCAACTTAAC
A6	oligopaint_06	GCATGCAGCATCTGGGAATCATGGTGGACAAtttCAACTTAAC
A7	oligopaint_07	GTCGCCAGATGACCCGTAGTCCACGTAGTTGtttCAACTTAAC
A8	oligopaint_08	GCCAGCCCACCTTACTACCTTACTATGTACAGTGTCAGtttCAACTTAAC
A9	oligopaint_09	AAGAATGGTCGCCGGGTGCATGGTCTCCCAGtttCAACTTAAC
A10	oligopaint_10	GAGATGCACCCTTCGGCCAATGCTGCCCAACtttCAACTTAAC
A11	oligopaint_11	TTCCCACTCCGCGAACAGCTTGTAGATGGCAtttCAACTTAAC
A12	oligopaint_12	TGCACCGGATGATGATCTGCCCATGTTGAATCtttCAACTTAAC
B1	oligopaint_13	CCTCGTTGATATCCATTGGCTCCGAACCCATCTtttCAACTTAAC
B2	oligopaint_14	GCGAGAAGGCTTGGCGCGATTTTATTATTGCAAAAtttCAACTTAAC
B3	oligopaint_15	CTTGGCTGTCATTTTCGAGGTACCCTTGCCCtttCAACTTAAC
B4	oligopaint_16	GGATTCACGGCCGTTGTCACTGTCAACTCGAtttCAACTTAAC
B5	oligopaint_17	TTGCTGTCGATGGTGAAATCGCTGATGGTCAtttCAACTTAAC
B6	oligopaint_18	CCCCAAGAACGCTCTGATGGCCCTCAACGAGtttCAACTTAAC
B7	oligopaint_19	CGGTTCTGTCGCAACTTCTTGTCCCGAGTGCtttCAACTTAAC
B8	oligopaint_20	GCCCATAGCGAAGTTTATCCTTGTCTGAATATGCCTTTGGtttCAACTTAAC
B9	oligopaint_21	CCGAAACGTAGAAGCAAATCGGCTAGGTTCACCtttCAACTTAAC
B10	oligopaint_22	AATCGGAAGATGGTGCTGTCCTCGGCATCTAtttCAACTTAAC
B11	oligopaint_23	CAAGCGTTGCCAGGACCTAGTGGACACCATGtttCAACTTAAC
B12	oligopaint_24	GCAGACCGGAAATTACTTACAGTTGTGTTGCGAGTtttCAACTTAAC
C1	oligopaint_25	GAAACCTAGTGCTTTGTGTGAGCGTGTGAAAATTCTGGtttCAACTTAAC
C2	oligopaint_26	GAAGTCGTCTGGTAAGCGAGGAAACCTTTGGTGtttCAACTTAAC
C3	oligopaint_27	CTGGCACTGGTACTGGCACTGGTATTGTCCTtttCAACTTAAC
C4	oligopaint_28	GCCGATCTCTGTCAACGATGAACCGTCCGTCtttCAACTTAAC
C5	oligopaint_29	TGATAACTGGCATGGGCAGTTTGGAGGCAATtttCAACTTAAC
C6	oligopaint_30	CCAACTCGTCCGACCAGCAGAATAATCCGGAtttCAACTTAAC
C7	oligopaint_31	AAAATGCGTCCTGTGGCGATTGAACAGCCACtttCAACTTAAC
C8	oligopaint_32	AGCAGTCTTCTCCGGTGGCTTTATATCCGACATCtttCAACTTAAC
C9	oligopaint_33	ATTGGCGGCCTGCAACGGCATTTGGATCAAAtttCAACTTAAC
C10	oligopaint_34	ACTCTTTCGCAAACGCAGAATCCCAATGCCAtttCAACTTAAC
C11	oligopaint_35	GATTAGTTAGCGAAGGCAACGGGTTCCGCCTtttCAACTTAAC
C12	oligopaint_36	CAGTCCGCTGCAAGTGATTTTGTCTAGGGTAGCtttCAACTTAAC
D1	oligopaint_37	AAAAGCGACTCGCTGGCCAACGGAAACCATCtttCAACTTAAC
D2	oligopaint_38	TTTTAAGTAGACCAGCCGACCACCCTGACGGtttCAACTTAAC
D3	oligopaint_39	GGAACTAGCCATGGCCATTCCTGCGACCCAAtttCAACTTAAC
D4	oligopaint_40	AAACGGAGATCCACAGTCGCTGGGCAGTTGGtttCAACTTAAC
D5	oligopaint_41	GCCGAGGACTCCGGGACCAGGTAGTCTATGCtttCAACTTAAC
D6	oligopaint_42	CGATGACCGAAGGATCCCCATAACTATTGTTTCATGCTAAtttCAACTTAAC
D7	oligopaint_43	TCGTTTCGGGCACTTTCGGTGGAGTGAATGGtttCAACTTAAC
D8	oligopaint_44	ACGCTGGACTTGCGGTTATCGCTAACTTTTATGGtttCAACTTAAC
D9	oligopaint_45	CAGTGCTGGCCATATCTAGTTGATCGAAAGCACGtttCAACTTAAC
D10	oligopaint_46	ACATTCGTAACCCACCCATTTGCATTGCACTCATTtttCAACTTAAC
D11	oligopaint_47	GGGGTGCATTGTGAATGCTGGTGGAATTCGGtttCAACTTAAC
D12	oligopaint_48	TGCAATAGCCACTAAAAGCGGGTTAATCGAAAGTGCtttCAACTTAAC
E1	oligopaint_49	AATTGTGAATGAACACTTTCACTTTGTGCGCTGCAAATTtttCAACTTAAC
E2	oligopaint_50	TGACGTCACGAAGATATGTATTCCGAGTGAAAATGCATCAtttCAACTTAAC
E3	oligopaint_51	TGCCTCCAAAGACAAATGGCTTGTTGTTTCCAGCtttCAACTTAAC
E4	oligopaint_52	TGCAGTACGATTCTTTCTGTGACCTGAGCAGTGAAAAtttCAACTTAAC
E5	oligopaint_53	CTGGCCATAGTAATATAAGCAAAGTGATGGAAAGACGGCGtttCAACTTAAC
E6	oligopaint_54	GCAAGTCATGAAAAGTCATGCGCTTATGGTTCGAGTTCTAtttCAACTTAAC
E7	oligopaint_55	TGCCTGTCTGCAGCGTGGGCAAAATCTATAAtttCAACTTAAC
E8	oligopaint_56	CCGTCGCACTCCCACTATCTAAGTAACAGGTATCTTACCtttCAACTTAAC
E9	oligopaint_57	GGTGTTCACACTGTGTTCACAAGAGTTTTGCGTTTCCtttCAACTTAAC
E10	oligopaint_58	GCCTATGCAGCGCAGTTTGACACTGCTTAAATATTCGTAtttCAACTTAAC
E11	oligopaint_59	AGTCCCTTAAGGTTCGCGAGGTTTCAAAGGTCAtttCAACTTAAC
E12	oligopaint_60	GGATCACAAGACGAGTCGAGCTGTCCCATATTCTTTTtttCAACTTAAC
F1	oligopaint_61	GGGAACTCAATACACACATATACCAACCCACTTGCAGAtttCAACTTAAC
F2	oligopaint_62	GCTCTTGTACCGCAGTGAAGAAAACTTTTGCGACAGTATTtttCAACTTAAC
F3	oligopaint_63	TAATTGTTTAGTCGCGTTTCCACATATGCACATACGCACtttCAACTTAAC
F4	oligopaint_64	AACTGAGAGAAATCAAAAGAAGACTCACGAAAGGAACCCAtttCAACTTAAC
F5	oligopaint_65	GCCGGGCGCGTGCGCATTTAAAACAATTCTCtttCAACTTAAC
F6	oligopaint_66	ACACTTACCGCTTGAAAATGTACAAAATCTTGGGTGACGtttCAACTTAAC
F7	oligopaint_67	ATGGGACATTGGAGATTTGTACATGGATGCTAGTGGGtttCAACTTAAC
F8	oligopaint_68	GCGAACTTGACACCCAACCAGTCAGCGAAATTTTAAtttCAACTTAAC
F9	oligopaint_69	ATGTGTGGAATTTGGTTGGGTCACTTTTCTCGATGTGtttCAACTTAAC
F10	oligopaint_70	GGTTTGCTGAGCCGAAAGAATACTGACCTCTGGTAAAAtttCAACTTAAC
F11	oligopaint_71	GCTTATCGGATCATTAGGCTAGTTACCGTTAAGCGGTtttCAACTTAAC
F12	oligopaint_72	CCATTGCATAGATAGCAAAACACGAAACCCCAACTTGTtttCAACTTAAC
G1	oligopaint_73	TTGGACTGGGTGTTAATTATTTCTATGCCGGTTTGCTGCtttCAACTTAAC
G2	oligopaint_74	CCGTTCGCTTGAAAGCTAGGAAGCTAATTGATCAATGACAtttCAACTTAAC
